# Supplementary material for: Successive Short- and Long-Range Magnetic Ordering in Ba2Mn3(SeO3)6 with Honeycomb Layers of Mn3+ Ions Alternating with Triangular Layers of Mn2+ Ions
Source: MDPI journal article supplement (doi:10.3390/ma16072685), 2023-03-28
Supplement: s1 [file s1]

Supplementary Information  
for  
**Successive Short- and Long-Range Magnetic Ordering in  
 $\text{Ba}_2\text{Mn}_3(\text{SeO}_3)_6$  with Honeycomb Layers of  $\text{Mn}^{3+}$  ions  
Alternating with Triangular Layers of  $\text{Mn}^{2+}$  ions**

Artem Moskin <sup>1,2</sup>, Ekaterina Kozlyakova <sup>1,2</sup>, Seung Hwan Chung <sup>3</sup>, Hyun-Joo Koo <sup>3</sup>,  
Myung-Hwan Whangbo <sup>3,4</sup>, Alexander Vasiliev <sup>1,2,\*</sup>

<sup>1</sup> Department of Low Temperature Physics and Superconductivity, Lomonosov Moscow State University, Moscow 119991, Russia;

<sup>2</sup> Functional Quantum Materials Laboratory, National University of Science and Technology "MISIS", Moscow 119049, Russia

<sup>3</sup> Department of Chemistry and Research Institute for Basic Sciences, Kyung Hee University, Seoul 02447, Republic of Korea

<sup>4</sup> Department of Chemistry, North Carolina State University, Raleigh, NC 27695-8204, USA

\* Correspondence: vasil@mig.phys.msu.ru (A.V.); hjkoo@khu.ac.kr (H.-J.K.)

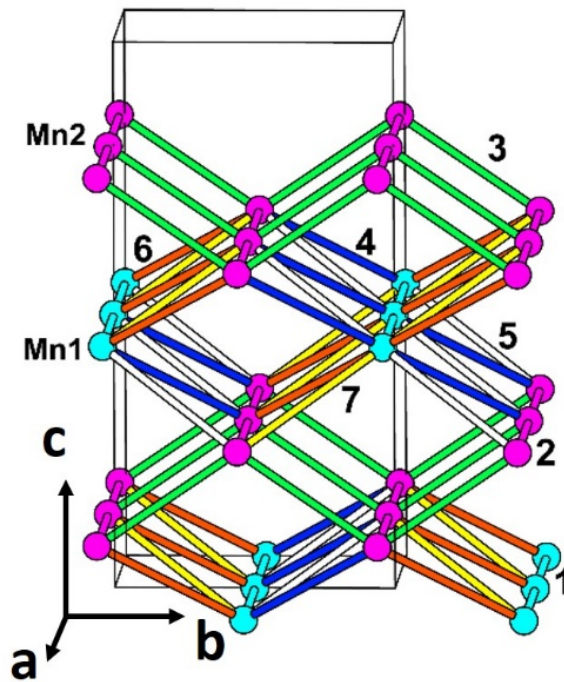

**Figure S1.** Spin exchange paths in  $\text{Ba}_2\text{Mn}_3\text{O}(\text{SeO}_3)_6$ . Each exchange path is represented by a colored cylinder. The blue and violet circles indicate  $\text{Mn}^{2+}$  and  $\text{Mn}^{3+}$  ions, respectively. The numbers 1 – 7 in black represent the spin exchange paths  $J_1 - J_7$ , respectively.

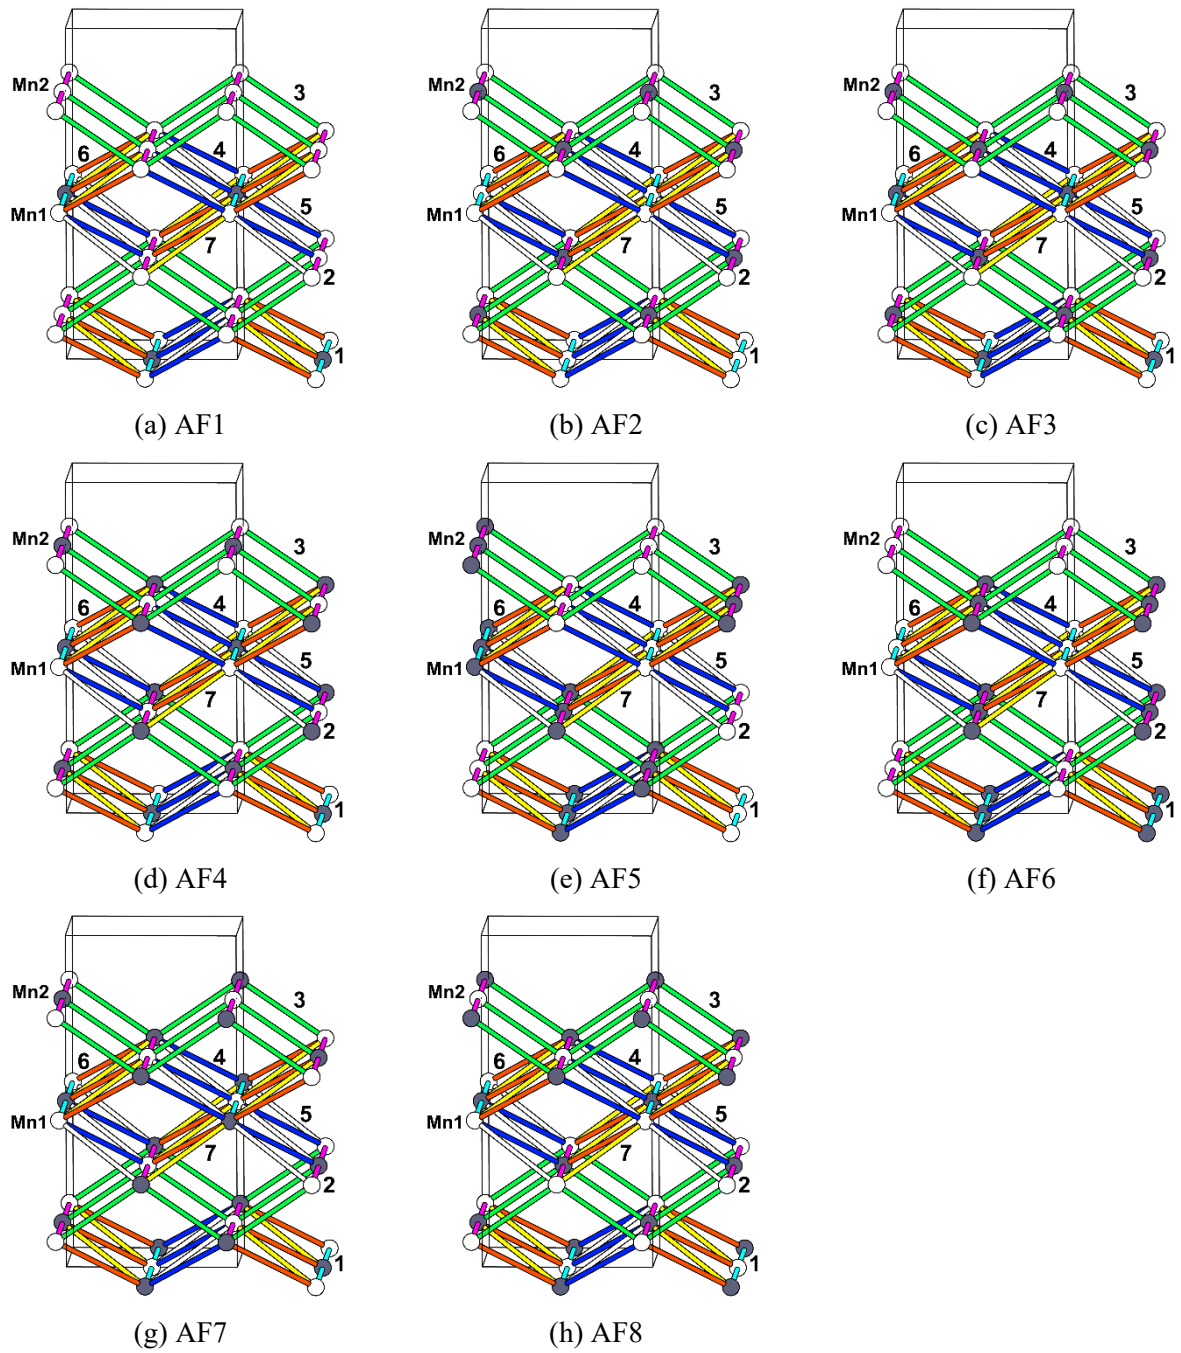

**Figure S2.** Ordered spin states of AF(i) ( $i = 1$  to 8) state. The shaded and open circles indicate the up and down spin sites, respectively.
